# Supplementary material for: URMAP, an ultra-fast read mapper
Source: PeerJ journal article supplement (doi:10.7717/peerj.9338), 2020-06-24
Supplement: supp_table1_urbench_speed.pdf [file supp_table1_urbench_speed.pdf]

| Method   | Speed |
|----------|-------|
| URMAPv   | 27.9  |
| URMAP    | 10.3  |
| Hisat2   | 9.5   |
| SNAP     | 7.3   |
| FSVA     | 5.4   |
| Bowtie2  | 2.4   |
| Minimap2 | 1.6   |
| BWA      | 1.0   |
