# Supplementary material for: URMAP, an ultra-fast read mapper
Source: PeerJ journal article supplement (doi:10.7717/peerj.9338), 2020-06-24
Supplement: supp_table2_urbench_accuracy.pdf [file supp_table2_urbench_accuracy.pdf]

| Method   | $Svar_r$ | $Evar_r$ | $Svar_l$ | $Evar_l$ | $Sref_r$ | $Eref_r$ | $Sref_l$ | $Eref_l$ |
|----------|----------|----------|----------|----------|----------|----------|----------|----------|
| BWA      | 96.3%    | 1.21%    | 97.4%    | 1.2%     | 96.7%    | 0.01%    | 97.3%    | 0%       |
| Bowtie2  | 92.4%    | 0.09%    | 94.5%    | 0.059%   | 94.9%    | 0.02%    | 95.7%    | 0%       |
| FSVA     | 88.9%    | 3.78%    | 94.0%    | 2.2%     | 93.8%    | 1.23%    | 96.1%    | 0.11%    |
| Hisat2   | 89.9%    | 2.36%    | 93.6%    | 1.8%     | 95.5%    | 0.52%    | 97.0%    | 0.13%    |
| Minimap2 | 91.0%    | 0.88%    | 93.8%    | 1.3%     | 93.7%    | 0.02%    | 95.5%    | 0%       |
| SNAP     | 94.9%    | 1.25%    | 96.8%    | 1.1%     | 96.5%    | 0.12%    | 97.3%    | 0.026%   |
| URMAP    | 95.2%    | 0.79%    | 96.8%    | 0.66%    | 96.1%    | 0.17%    | 96.8%    | 0%       |
| URMAPv   | 90.0%    | 0.97%    | 92.7%    | 1.1%     | 93.7%    | 0.27%    | 95.2%    | 0.0055%  |
