# Supplementary material for: URMAP, an ultra-fast read mapper
Source: PeerJ journal article supplement (doi:10.7717/peerj.9338), 2020-06-24
Supplement: supp_table3_wgsim_accuracy.pdf [file supp_table3_wgsim_accuracy.pdf]

| Length | Species | bowtie2    | bwa        | fsva       | hisat2     | minimap2   | snap       | urmap      |
|--------|---------|------------|------------|------------|------------|------------|------------|------------|
| 150    | at      | 93.8(0.33) | 99.1(0.00) | 92.3(0.22) | 96.3(0.45) | 99.0(0.00) | 99.0(0.00) | 98.4(0.00) |
| 150    | dm      | 91.2(0.47) | 98.6(0.01) | 88.9(0.30) | 94.8(1.06) | 97.8(0.01) | 98.5(0.01) | 97.7(0.03) |
| 150    | hs      | 90.4(0.28) | 96.5(0.03) | 88.2(0.61) | 93.0(1.49) | 95.5(0.02) | 96.0(0.20) | 95.0(0.80) |
| 250    | at      | 95.1(0.14) | 99.4(0.00) | 98.4(0.18) | 90.0(0.51) | 99.2(0.00) | 98.9(0.00) | 99.0(0.00) |
| 250    | dm      | 92.8(0.24) | 99.6(0.00) | 96.6(0.19) | 89.8(1.14) | 98.9(0.00) | 99.0(0.00) | 99.2(0.02) |
| 250    | hs      | 91.9(0.26) | 97.1(0.01) | 95.1(0.59) | 88.0(1.80) | 96.3(0.01) | 96.4(0.11) | 95.9(0.73) |
| 300    | at      | 95.4(0.11) | 99.4(0.00) | 98.8(0.17) | 85.9(0.55) | 99.0(0.00) | 98.5(0.00) | 99.0(0.00) |
| 300    | dm      | 93.2(0.21) | 99.6(0.00) | 97.7(0.17) | 85.7(1.16) | 98.7(0.02) | 98.4(0.00) | 99.3(0.02) |
| 300    | hs      | 92.5(0.24) | 97.2(0.01) | 95.9(0.61) | 84.7(1.90) | 96.1(0.03) | 95.8(0.10) | 96.1(0.72) |
