# Supplementary material for: URMAP, an ultra-fast read mapper
Source: PeerJ journal article supplement (doi:10.7717/peerj.9338), 2020-06-24
Supplement: supp_table4_mapped_counts.pdf [file supp_table4_mapped_counts.pdf]

|          | Unmapped   | MAPQ=0     | MAPQ=1     | MAPQ≥10     | Total Mapped |
|----------|------------|------------|------------|-------------|--------------|
| Bowtie2  | 17,666,223 | 7,077,301  | 23,133,412 | 469,936,740 | 520,327,073  |
| BWA      | 3,144,866  | 30,380,300 | 6,36,145   | 499,499,571 | 534,848,430  |
| Hisat2   | 40,699,971 | 24,75,552  | 13,260,727 | 481,557,046 | 497,293,325  |
| Minimap2 | 6,437,382  | 25,090,222 | 12,280,957 | 486,945,308 | 531,555,914  |
| SNAP     | 21,840,285 | 12,214,496 | 6,402,678  | 487,784,019 | 516,153,011  |
| URMAP    | 15,914,042 | 22,774,825 | 1,437,461  | 487,160,133 | 522,079,254  |
| URMAPv   | 39,858,685 | 19,150,939 | 1,243,423  | 468,811,744 | 498,134,611  |
